# Supplementary material for: Evaluation of sialic acid based on electrochemical cytosensor with 3D micro/nanostructured sensing interface
Source: Royal Society of Chemistry journal article supplement (doi:10.1039/c7ay02185b), 2017-01-01
Supplement: c7ay02185b1.pdf [file c7ay02185b1.pdf]

## Electronic Supplementary Information

### Evaluation of sialic acid based on electrochemical cytosensor with 3D micro/nanostructured sensing interface

Shangshang Ma<sup>a†</sup>, Sisheng Hu<sup>b†</sup>, Qi Wang<sup>a</sup>, Yuhong Liu<sup>a</sup>, Guangyao Zhao<sup>a</sup>, Qicheng  
Zhang<sup>a</sup>, Chun Mao<sup>a\*</sup>, Bo Zhao<sup>a\*</sup>

a National and Local Joint Engineering Research Center of Biomedical Functional  
Materials, School of Chemistry and Materials Science, Nanjing Normal University,  
Nanjing, 210023, China

b State Key Laboratory of Pharmaceutical Biotechnology, School of Life Sciences,  
Institute of Chemistry and BioMedical Sciences, Nanjing University, Nanjing,  
210093, China.

E-mail: (maochun@njnu.edu.cn (C. Mao), zhaobo@njnu.edu.cn (B. Zhao))

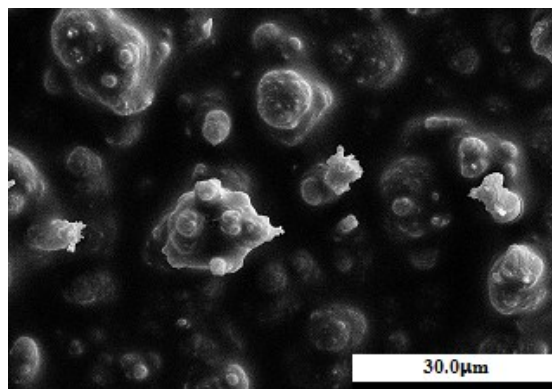

Fig. S1. SEM image of cPPy film.

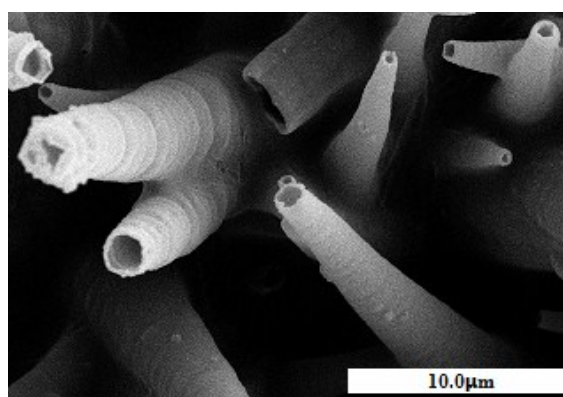

Fig. S2. Enlarged SEM image of hPPy film.

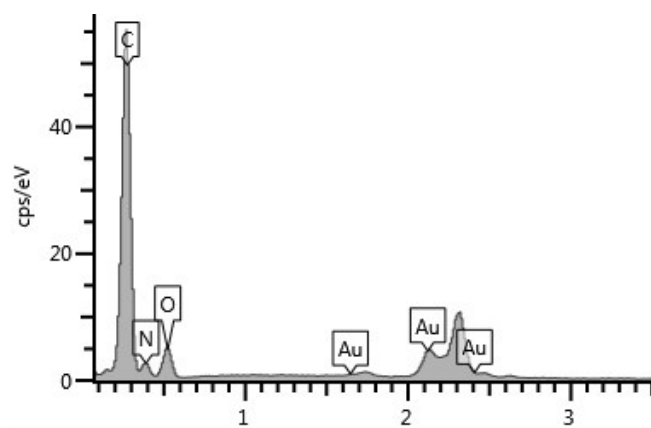

Fig. S3. Elemental surface analysis (by EDS spectrum) of hPPy/CS-Au film.

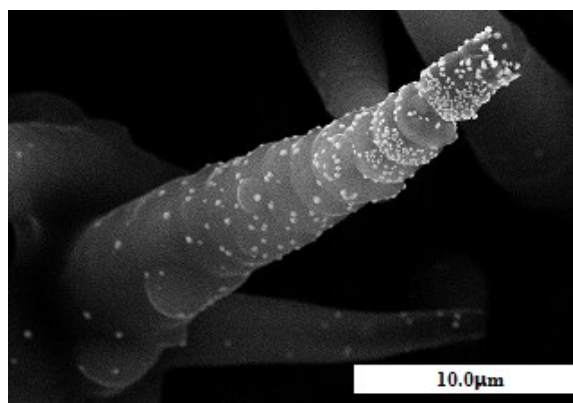

Fig. S4. Enlarged SEM image of CS-Au hPPy film.

| Table S1. Comparison of the detection performance of different sensors for cell detection |               |                                          |                                           |           |
|-------------------------------------------------------------------------------------------|---------------|------------------------------------------|-------------------------------------------|-----------|
| sensor                                                                                    | analyte       | linear range (cells mL <sup>-1</sup> )   | detection limit (cells mL <sup>-1</sup> ) | reference |
| GCE/MWNT/<br>AuNP/SNA                                                                     | A549<br>cell  | $3.0 \times 10^4$ to $3.0 \times 10^7$   | 700                                       | [1]       |
| GCE/BSA-incorporated Ag<br>nanoflowers/GA/SNA                                             | DLD-1<br>cell | $1.35 \times 10^2$ to $1.35 \times 10^7$ | 40                                        | [2]       |
| HRP-CNS/AuNP-SNA                                                                          | MCF-7<br>cell | $1.0 \times 10^2$ to $1.0 \times 10^6$   | 40                                        | [3]       |
| GE/PPy-<br>Ag@BSA/PDITC/APBA                                                              | 786-O<br>cell | $1.7 \times 10$ to $1.7 \times 10^6$     | 6                                         | [4]       |
| hPPy film/CS-AuNP/SNA                                                                     | A549          | $1.0 \times 10$ to $1.0 \times 10^7$     | 2                                         | this work |

|  |      |  |  |  |
|--|------|--|--|--|
|  | cell |  |  |  |
|--|------|--|--|--|

- 1 X. Zhang, Y. Teng, Y. Fu, L. Xu, S. Zhang, B. He, C.Wang and W. Zhang, *Anal. Chem.*, 2010, **82**, 9455-9460
- 2 H. Cao, D. P. Yang, D. Ye, X. Zhang, X. Fang, S. Zhang, B. Liu, and J. Kong, *Biosens. Bioelectron.*, 2015, **68**, 329-335.
- 3 P. Geng, C. Feng, L. Zhu, J. Zhang, F. Wang, K. Liu, Z. Xu and W. Zhang, *Electroanalysis*, 2016, **28**, 1331-1339.
- 4 L. Zhang, C. Yu, R. Gao, Y. Niu, Y. Li, J. Chen and J. He, *Biosens. Bioelectron.*, 2017, **92**, 434-441.
